# Supplementary material for: Shikonin overcomes drug resistance and induces necroptosis by regulating the miR-92a-1-5p/MLKL axis in chronic myeloid leukemia
Source: Aging (Albany NY). 2020 Sep 14;12(17):17662–80. doi: 10.18632/aging.103844 (PMC7521527; doi:10.18632/aging.103844)
Supplement: Supplementary Table 1 [file aging-12-103844-s002..pdf]

## SUPPLEMENTARY TABLE

**Supplementary Table 1. Clinical characteristics of patients.**

| <b>Patients</b> | <b>Sex/age, y</b> | <b>Diagnosis</b> | <b>Prior treatment</b>      | <b>Bcr/abl expression</b> | <b>Mutation</b> |
|-----------------|-------------------|------------------|-----------------------------|---------------------------|-----------------|
| 1               | M/25              | Normal           | Newly diagnosed             | Negative                  | /               |
| 2               | M/29              | Normal           | Newly diagnosed             | Negative                  | /               |
| 3               | F/29              | Normal           | Newly diagnosed             | Negative                  | /               |
| 4               | M/25              | Normal           | Newly diagnosed             | Negative                  | /               |
| 5               | F/49              | Myeloid sarcoma  | Chemotherapy with HA scheme | Negative                  | /               |
| 6               | M/22              | Amygdalitis      |                             | Negative                  | /               |
| 7               | F/63              | lymphadenectasis |                             | Negative                  | /               |
| 8               | M/78              | Hemolytic anemia |                             | Negative                  | /               |
| 9               | F/34              | CML-CP           | Newly diagnosed             | 91%                       | None            |
| 10              | M/31              | CML-CP           | Newly diagnosed             | 65%                       | None            |
| 11              | F/50              | CML-CP           | Newly diagnosed             | 95%                       | None            |
| 12              | F/46              | CML-CP           | Newly diagnosed             | 86%                       | None            |
| 13              | M/47              | CML-CP           | Newly diagnosed             | 78%                       | None            |
| 14              | F/62              | CML-CP           | Newly diagnosed             | 29%                       | None            |
| 15              | M/62              | CML-BC           | Imatinib                    | 66%                       | E453G           |
| 16              | M/23              | CML-BC           | Imatinib                    | 76%                       | None            |
| 17              | F/51              | CML-BC           | Imatinib                    | 75%                       | None            |
| 18              | F/68              | CML-BC           | Imatinib                    | 64%                       | None            |
| 19              | M/15              | CML-BC           | Imatinib                    | 121%                      | T315I, E255K    |
| 20              | M/24              | CML-BC           | Imatinib                    | 97%                       | None            |
| 21              | M/70              | CML-BC           | Imatinib                    | 55%                       | None            |
